# Supplementary material for: Optimizing the performance of wide-bandgap CZTS solar cells: influence of heterojunction structure, buffer thickness and doping concentration
Source: Royal Society of Chemistry journal article supplement (doi:10.1039/d5nr04385a), 2026-01-01
Supplement: d5nr04385a1.pdf [file d5nr04385a1.pdf]

## Supporting Information

### **Optimizing the performance of wide-bandgap CZTS solar cells: Influence of heterojunction structures, buffer thickness and doping concentrations**

Siyu Wang,<sup>\*a</sup> Yue Liu,<sup>b</sup> Haoran Li,<sup>b</sup> and Yi Zhang<sup>\*b</sup>

<sup>a</sup> *School of Information Engineering, Tianjin University of Commerce, Tianjin 300134, China*

<sup>b</sup> *Institute of Photoelectronic Thin Film Devices and Technology and Tianjin Key Laboratory of Thin Film Devices and Technology, Nankai University, Tianjin 300350, China*

\*Corresponding author:

*E-mail address:* siyuwang202212@163.com (S. Wang);yizhang@nankai.edu.cn (Y. Zhang)

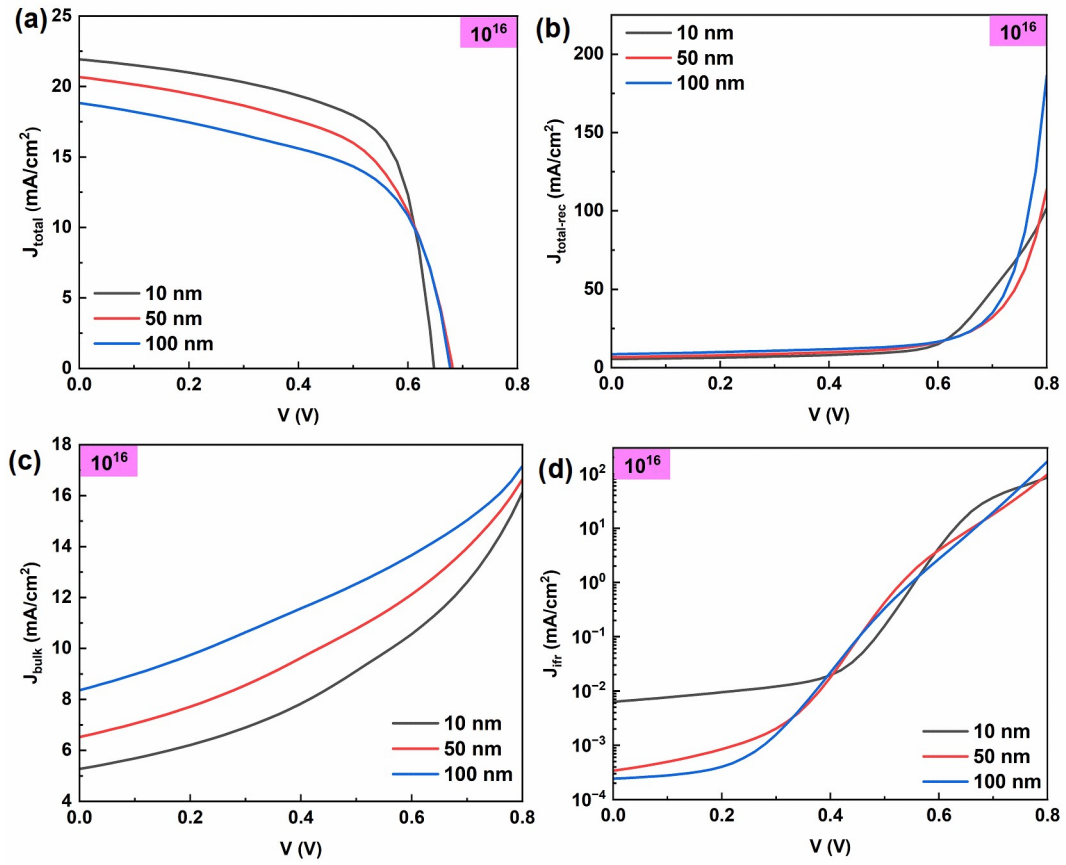

**Fig. S1** (a) The J-V curves of CZTS solar cells with the CdS layer (doping concentration of  $10^{16} \text{ cm}^{-3}$ ) thickness of 10 nm, 50 nm, and 100 nm. (b-d) The  $J_{\text{total-rec}}$ -V,  $J_{\text{bulk}}$ -V, and  $J_{\text{ifr}}$ -V curves of these CZTS solar cells.

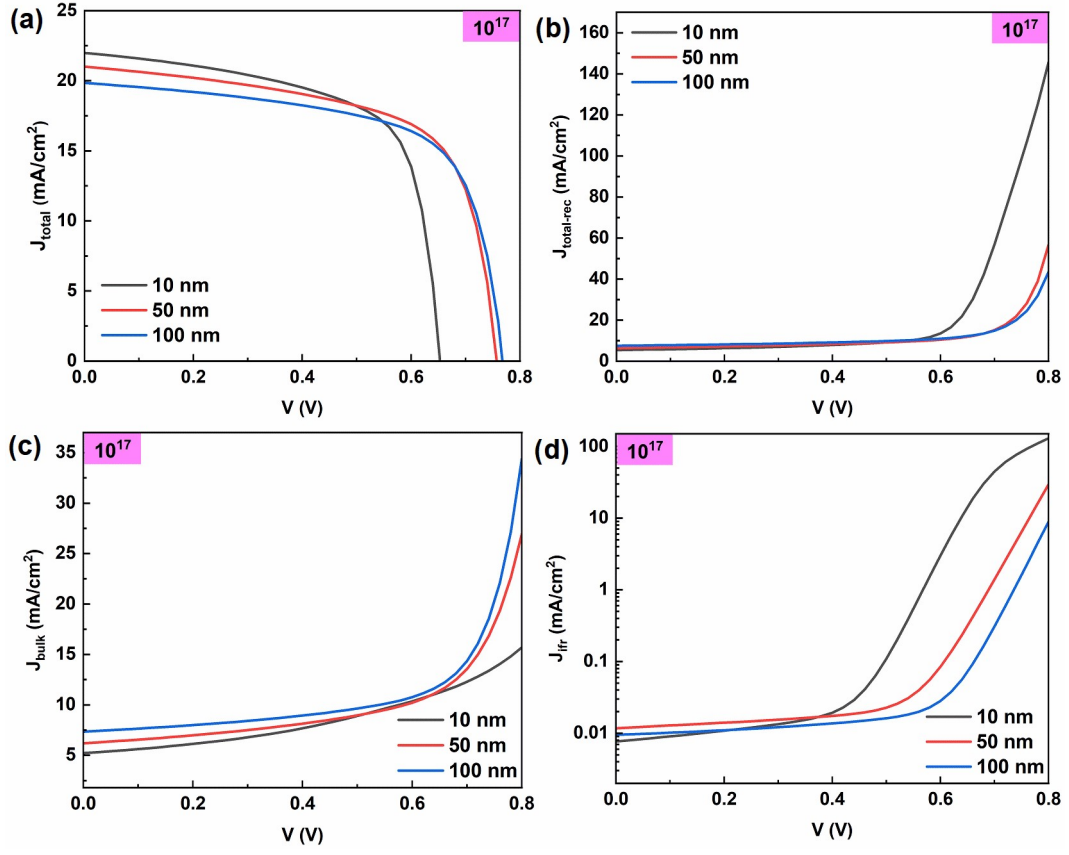

**Fig. S2** (a) The J-V curves of CZTS solar cells with the CdS layer (doping concentration of  $10^{17} \text{ cm}^{-3}$ ) thickness of 10 nm, 50 nm, and 100 nm. (b-d) The  $J_{\text{total-rec}}$ -V,  $J_{\text{bulk}}$ -V, and  $J_{\text{ifr}}$ -V curves of these CZTS solar cells.

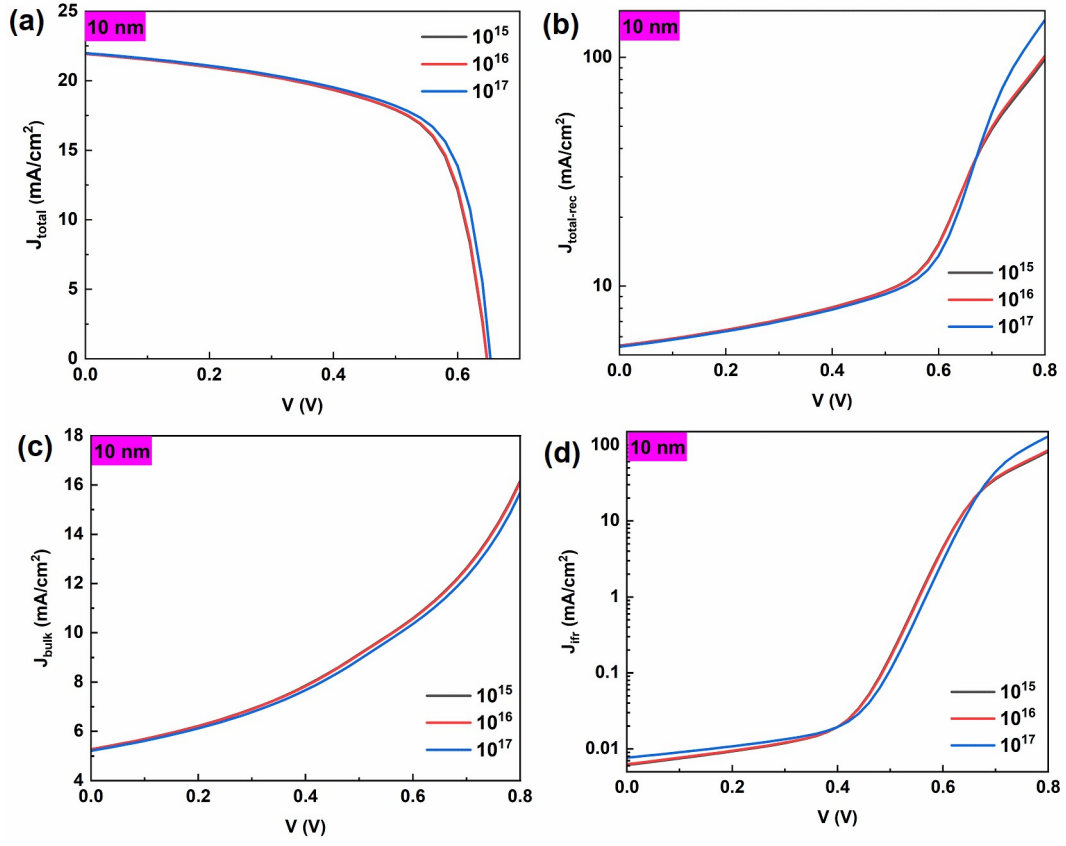

**Fig. S3** (a) The J-V curves of CZTS solar cells with the CdS layer (thickness of 10 nm) doping concentration of  $10^{15} \text{ cm}^{-3}$ ,  $10^{16} \text{ cm}^{-3}$ , and  $10^{17} \text{ cm}^{-3}$ . (b-d) The  $J_{\text{total-rec}}$ -V,  $J_{\text{bulk}}$ -V, and  $J_{\text{irr}}$ -V curves of these CZTS solar cells.

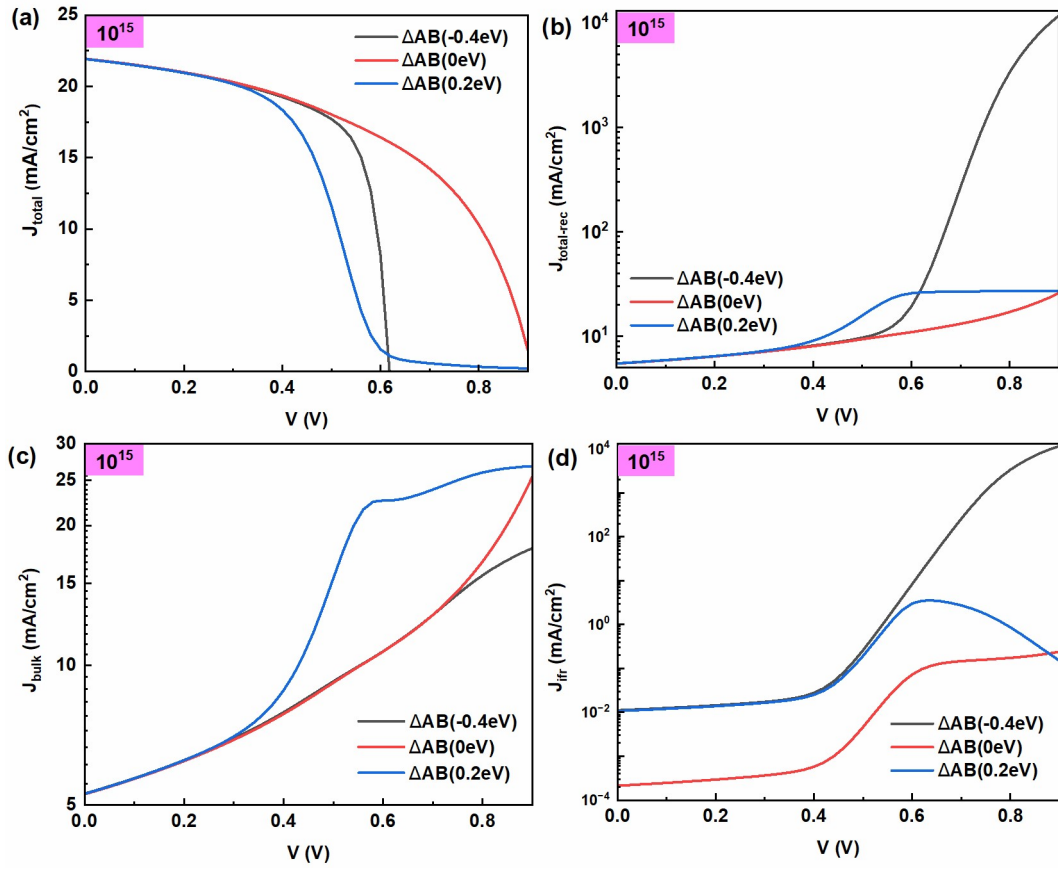

**Fig. S4** (a) The J-V curves of CZTS solar cells with the different CBO ( $-0.4 \text{ eV}$ ,  $0 \text{ eV}$ , and  $0.2 \text{ eV}$ ) and the CdS layer doping concentration of  $10^{15} \text{ cm}^{-3}$ . (b-d) The  $J_{\text{total-rec}}$ -V,  $J_{\text{bulk}}$ -V, and  $J_{\text{ifr}}$ -V curves of these CZTS solar cells.

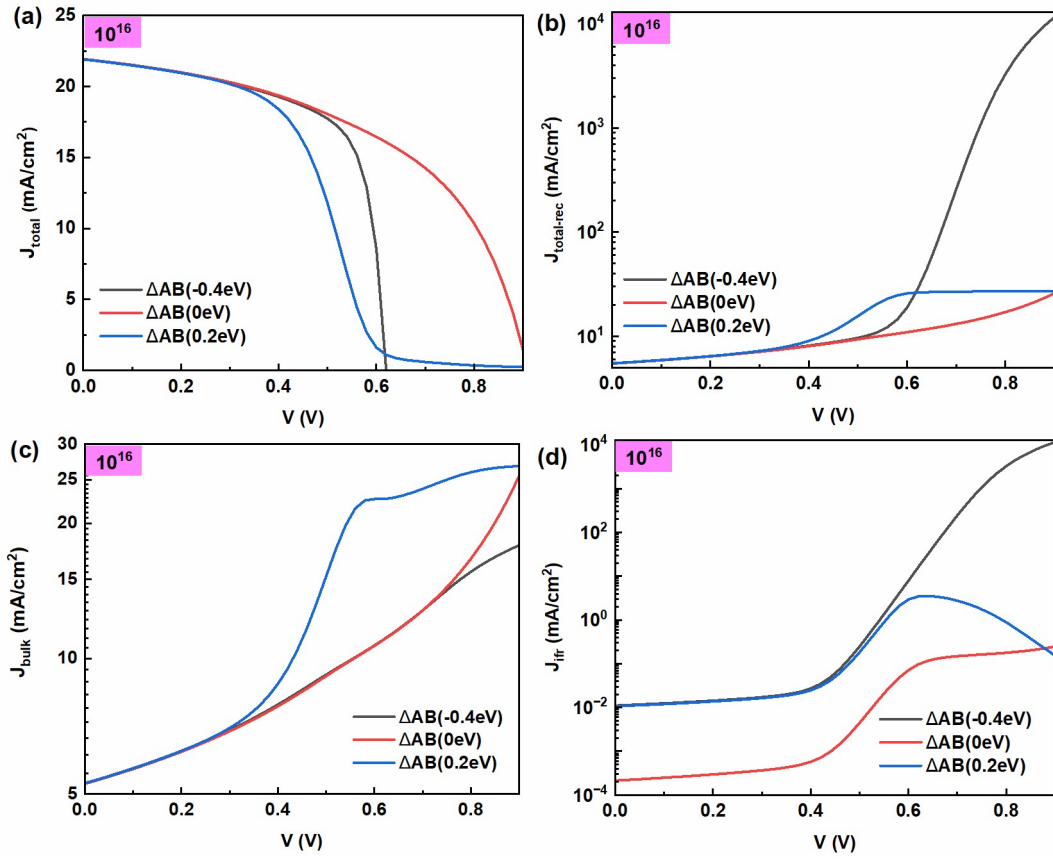

**Fig. S5** (a) The J-V curves of CZTS solar cells with the different CBO ( $-0.4 \text{ eV}$ ,  $0 \text{ eV}$ , and  $0.2 \text{ eV}$ ) and the CdS layer doping concentration of  $10^{16} \text{ cm}^{-3}$ . (b-d) The  $J_{\text{total-rec}}$ -V,  $J_{\text{bulk}}$ -V, and  $J_{\text{irr}}$ -V curves of these CZTS solar cells.

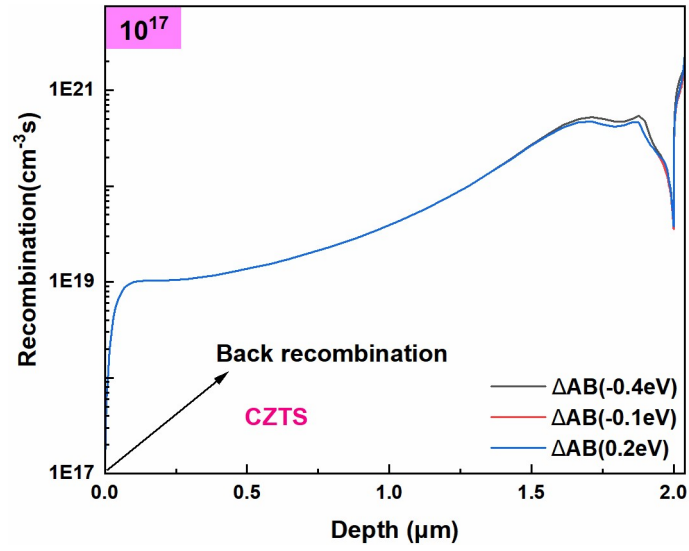

**Fig. S6** The recombination rate of CZTS solar cells with the different CBO ( $-0.4$  eV,  $-0.1$  eV, and  $0.2$  eV) and the CdS layer doping concentration of  $10^{17}$   $\text{cm}^{-3}$ .
